# Supplementary material
Source: PubMed Central journal article supplement (PMC3911373)
Supplement: IAI.00444-13_zii999090499so4.pdf [file IAI.00444-13_zii999090499so4.pdf]

## Supplemental Figure Legends

**Fig. S1.** TgPL1 is not expressed when the first two methionines are mutated. The top panel shows the expression of TgPL1-HA from 10 different clones containing a stable transfection of the M1-2 construct. Of the ten clones were tested by western immunoblot, none had a TgPL1-HA reactive protein. The bottom panel shows that all ten clones containing a stable transfection of the WT construct had expression of TgPL1. The positive control (+) is parasites previously selected to express WT TgPL1. Equal numbers of parasites were loaded per lane and the blot was stained with ponceau before probing to insure that there were no problems with the protein transfer and that lanes were approximately equally loaded.

**Fig. S2.** Wild type and  $\Delta$ TgPL1 infected mice have similar serum cytokine levels at 4 weeks post infection. Serum was collected from uninfected age-matched control mice (uninf, black squares), and mice infected with wild type (WT, medium grey diamonds)  $\Delta$ TgPL1 (dark grey circles) or complemented  $\Delta$ TgPL1 parasites (comp, light grey triangles) at 8 weeks post infection. Cytokines were assessed by cytometric bead array for the interleukin-12 heterodimer (IL-12p70, panel A), TNF $\alpha$  (panel B), IFN $\gamma$  (panel C), MCP-1 (panel D), IL-10 (panel E) and IL-6 (panel F). Each symbol represents cytokine levels from an individual mouse and horizontal bars indicate the mean of each group. No statistically significant differences were seen between any of the *T. gondii* infected mice.

**Fig. S3.** Wild type and  $\Delta$ TgPL1 infected mice have similar serum cytokine levels at 6 weeks post infection. Serum was collected from uninfected age-matched control mice (uninf, black squares), and mice infected with wild type (WT, medium grey diamonds)  $\Delta$ TgPL1 (dark grey circles) or complemented  $\Delta$ TgPL1 parasites (comp, light grey triangles) at 8 weeks post infection. Cytokines were assessed by cytometric bead array for IL-12p70 (A), TNF $\alpha$  (B), IFN $\gamma$  (C), MCP-1 (D), IL-10 (E) and IL-6 (F). Each symbol represents cytokine levels from an individual mouse and horizontal bars indicate the mean of each group. No statistically significant differences were seen between any of the *T. gondii* infected mice.
