# Supplementary material
Source: PubMed Central journal article supplement (PMC3911373)

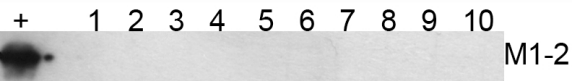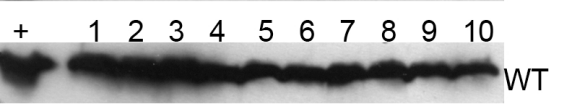

Supplement: IAI.00444-13_zii999090499so1.pdf [file IAI.00444-13_zii999090499so1.pdf]

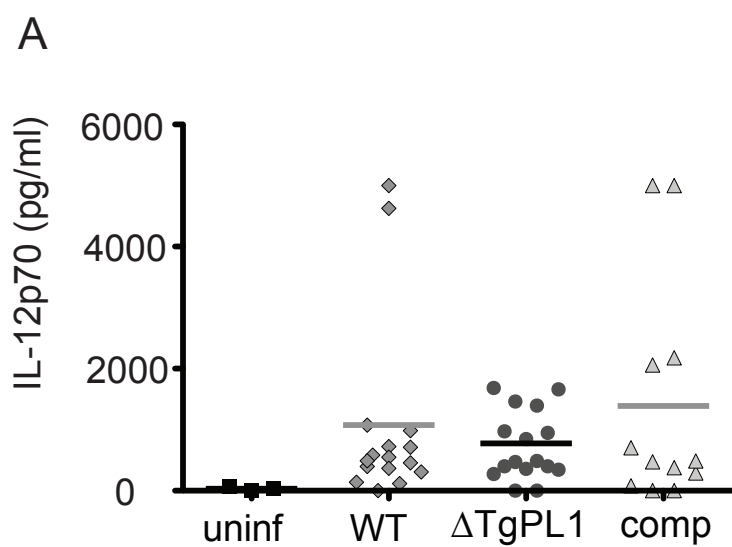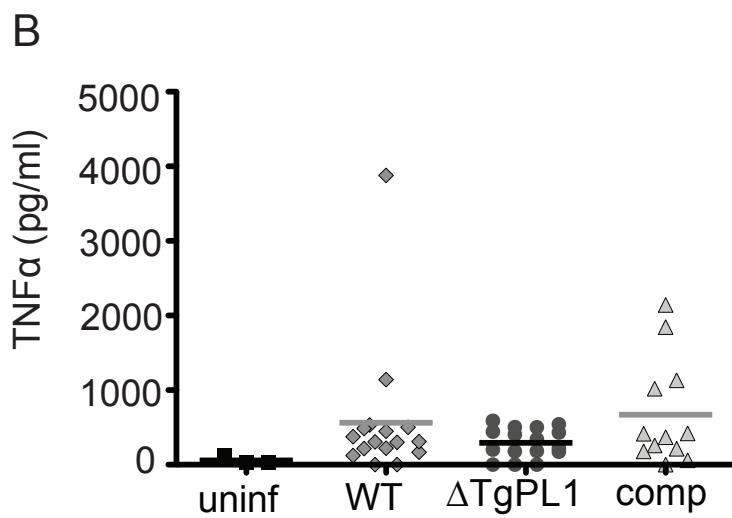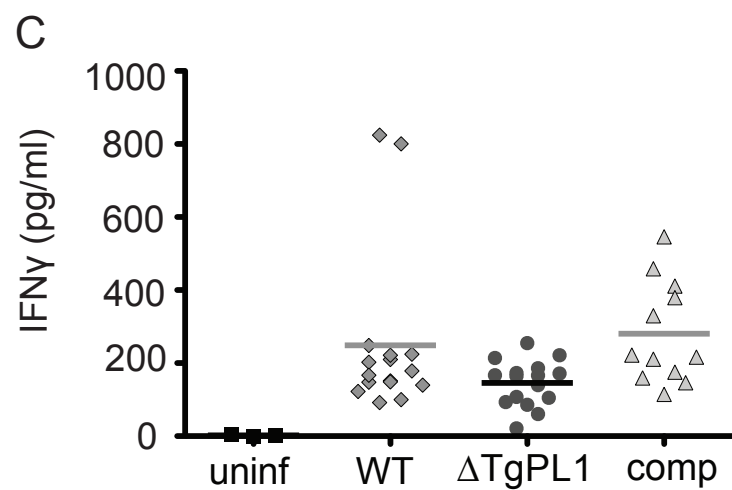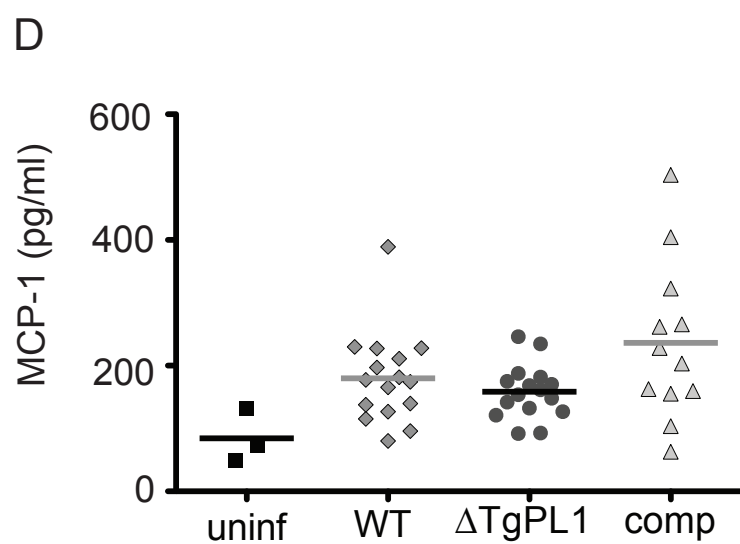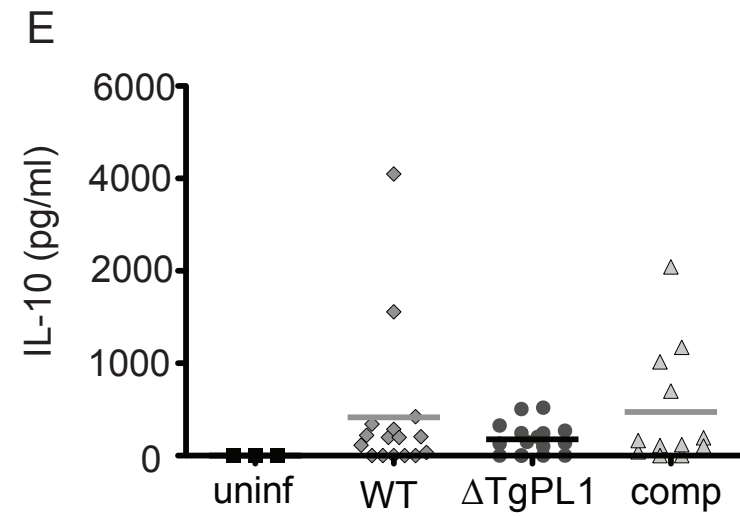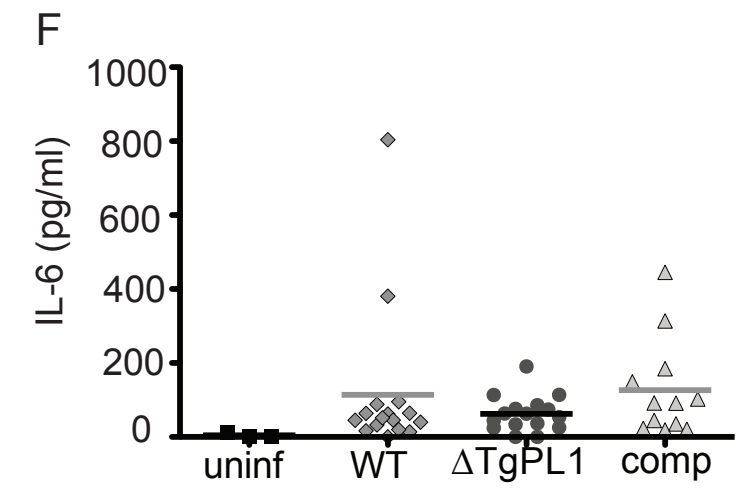

Supplement: IAI.00444-13_zii999090499so2.pdf [file IAI.00444-13_zii999090499so2.pdf]

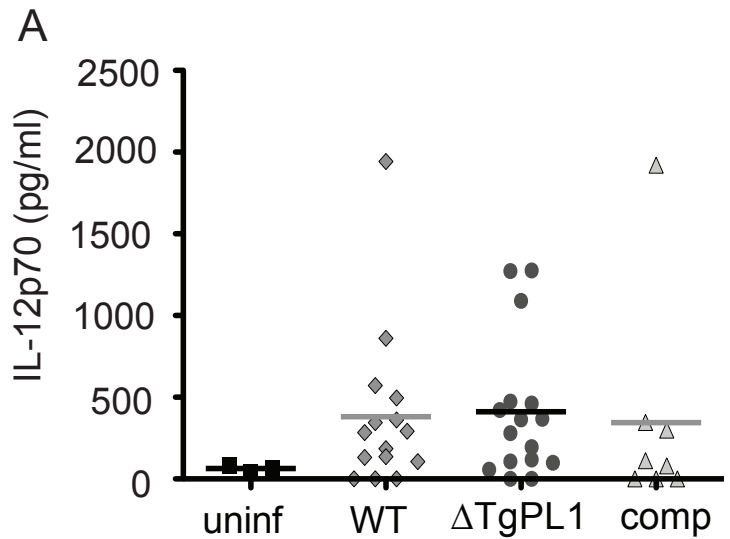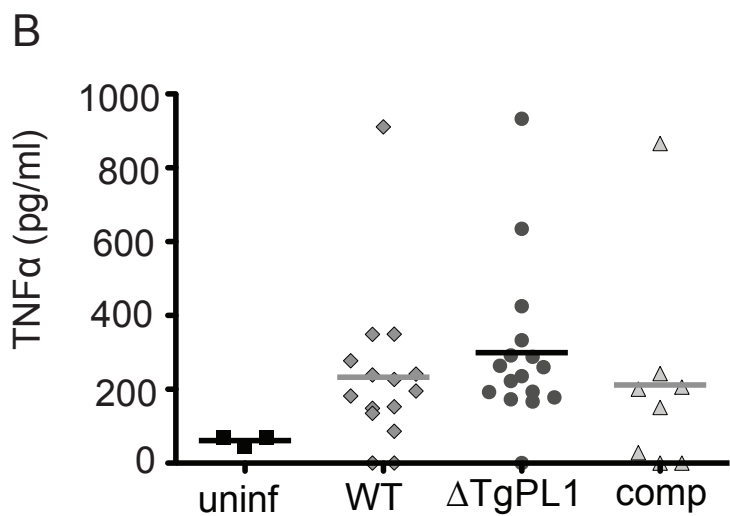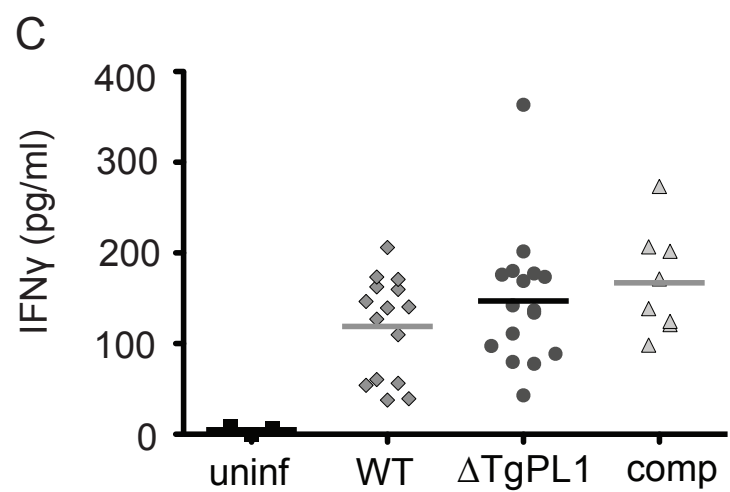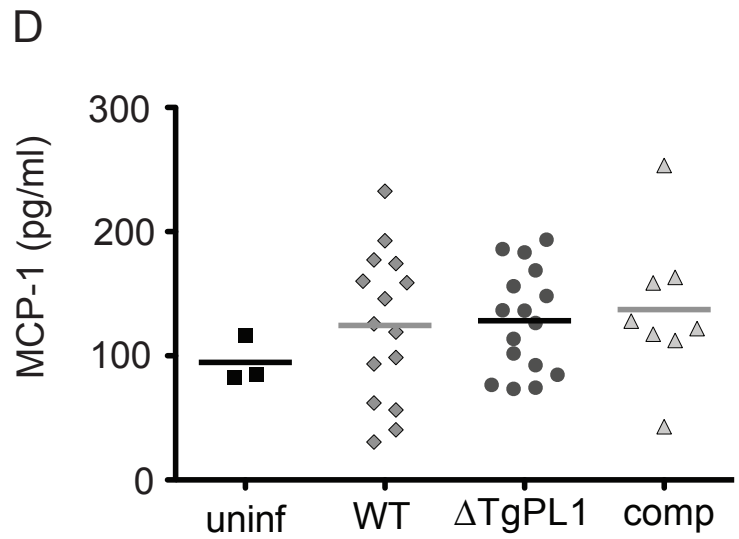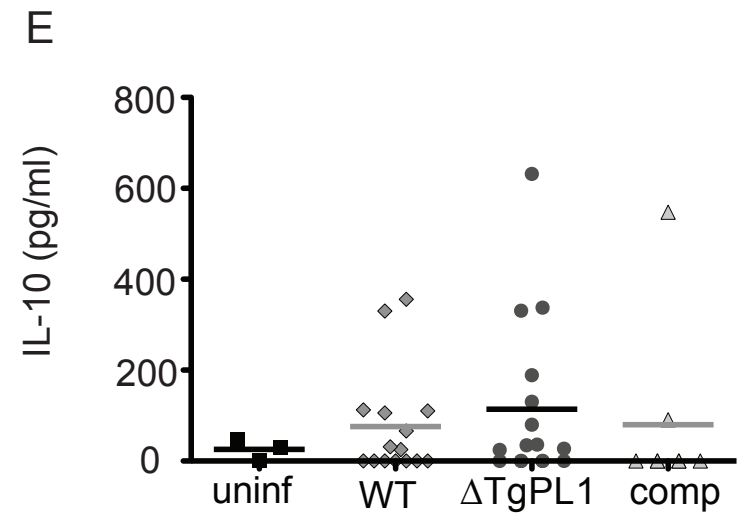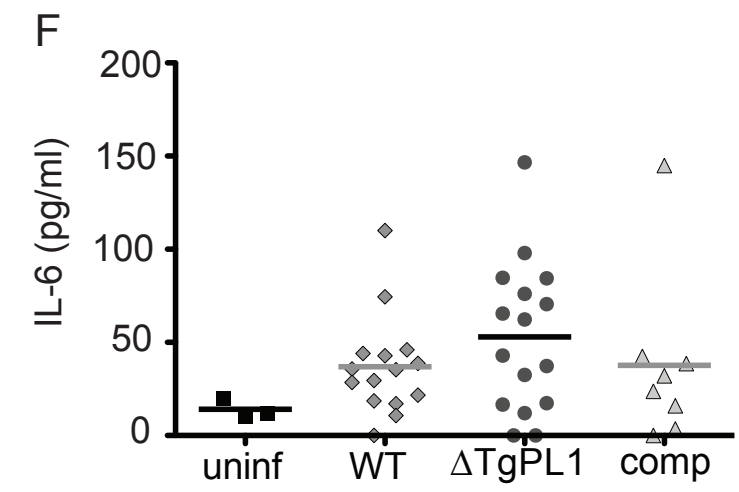

Supplement: IAI.00444-13_zii999090499so3.pdf [file IAI.00444-13_zii999090499so3.pdf]
